# Supplementary material for: Palladium catalyzed oxidation of renewable terpenes with molecular oxygen: oxidation of α-bisabolol under chloride-free conditions
Source: Royal Society of Chemistry journal article supplement (doi:10.1039/c4cy00260a), 2014-01-01
Supplement: c4cy00260a1.pdf [file c4cy00260a1.pdf]

# **Palladium catalyzed oxidation of terpenes with molecular oxygen: oxidation of $\alpha$ -bisabolol under chloride-free conditions**

**Luciana A. Parreira,<sup>a,b</sup> Luciano Menini,<sup>c</sup> and Elena V. Gusevskaya<sup>a\*</sup>**

<sup>a</sup> *Departamento de Química, Universidade Federal de Minas Gerais, 31270-901, Belo Horizonte, MG, Brazil, Fax: (+55)-31-3409-5700; phone (+55)-31-3409-5741; e-mail: elena@ufmg.br*

<sup>b</sup> *Departamento de Química e Física, Campus de Alegre – CCA, Universidade Federal do Espírito Santo, 29500-000 Caixa Postal 16, Alegre, ES, Brazil*

<sup>c</sup> *Campus de Alegre Instituto Federal de Educação, Ciência e Tecnologia do Espírito Santo, 29500-000 Caixa Postal 47, Alegre, ES, Brazil*

## **Supplementary Information**

Table of contents

Product characterization data -----S2-S6

## Product characterization data

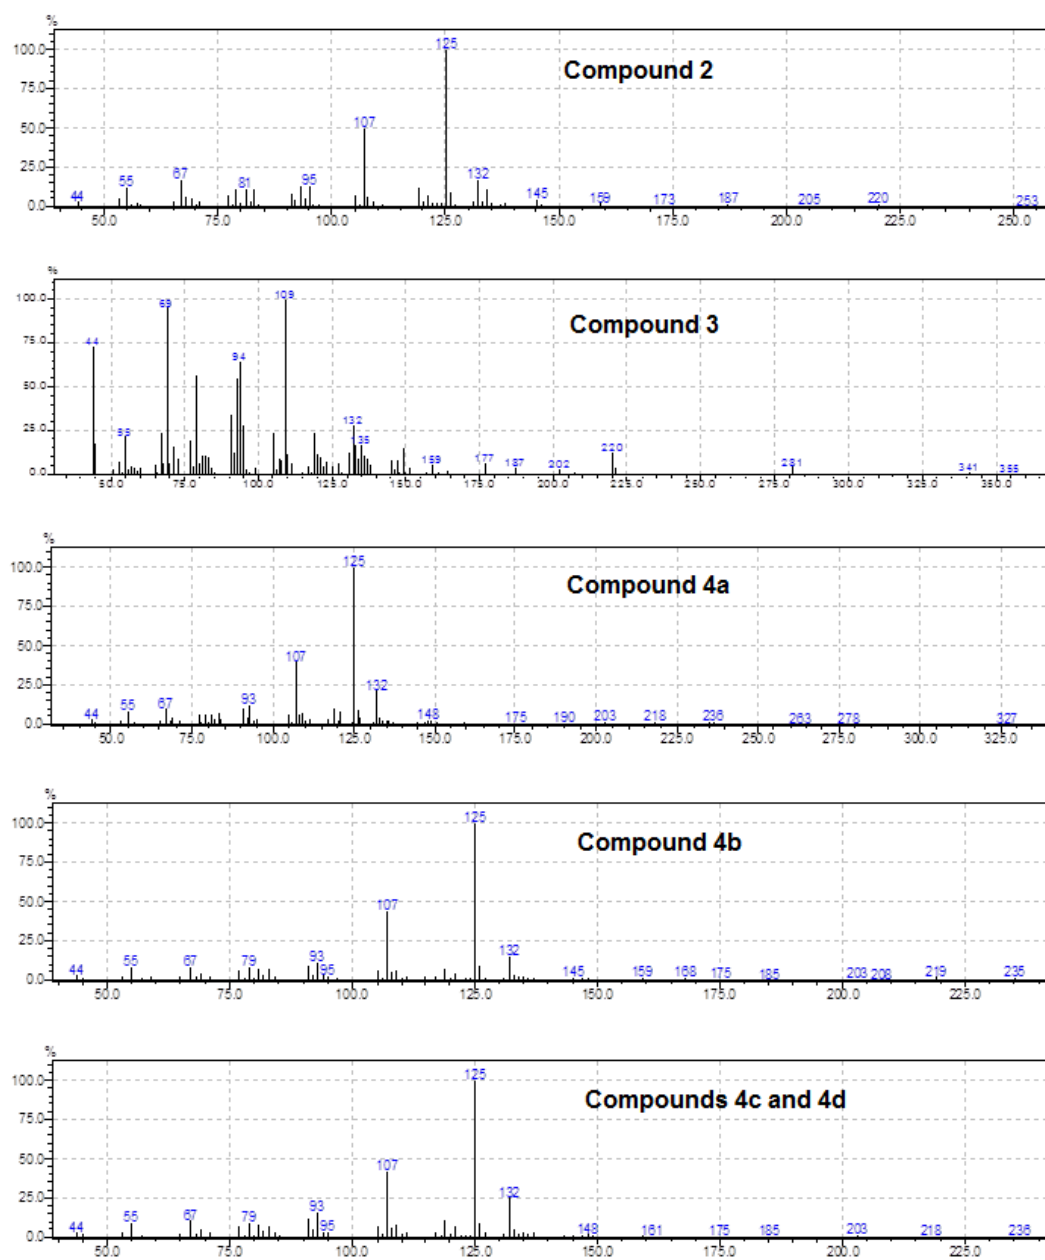

Fig. S1. Mass spectra of compounds **2**, **3**, **4a**, **4b** and **4c** and **4d** (the structures are shown in Figures 2–5).

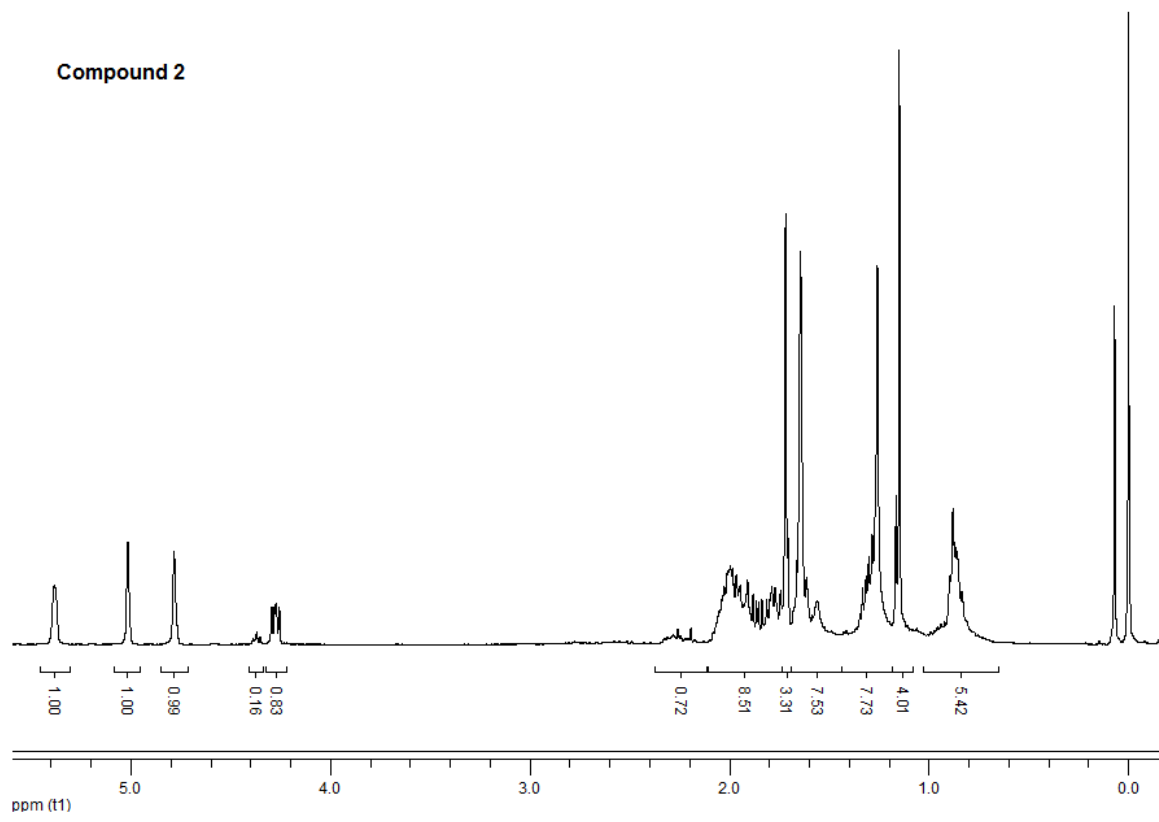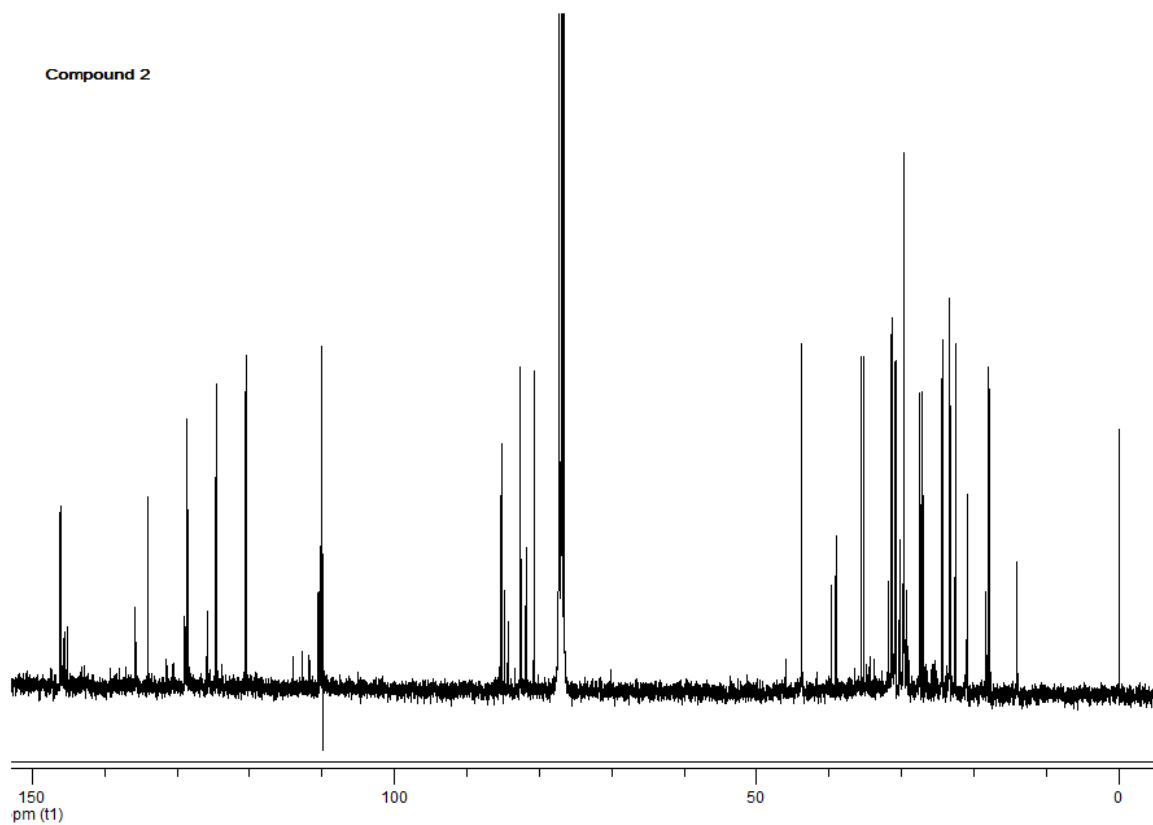

Fig. S2.  $^1\text{H}$  and  $^{13}\text{C}$  spectra of compound 2

Compound 3

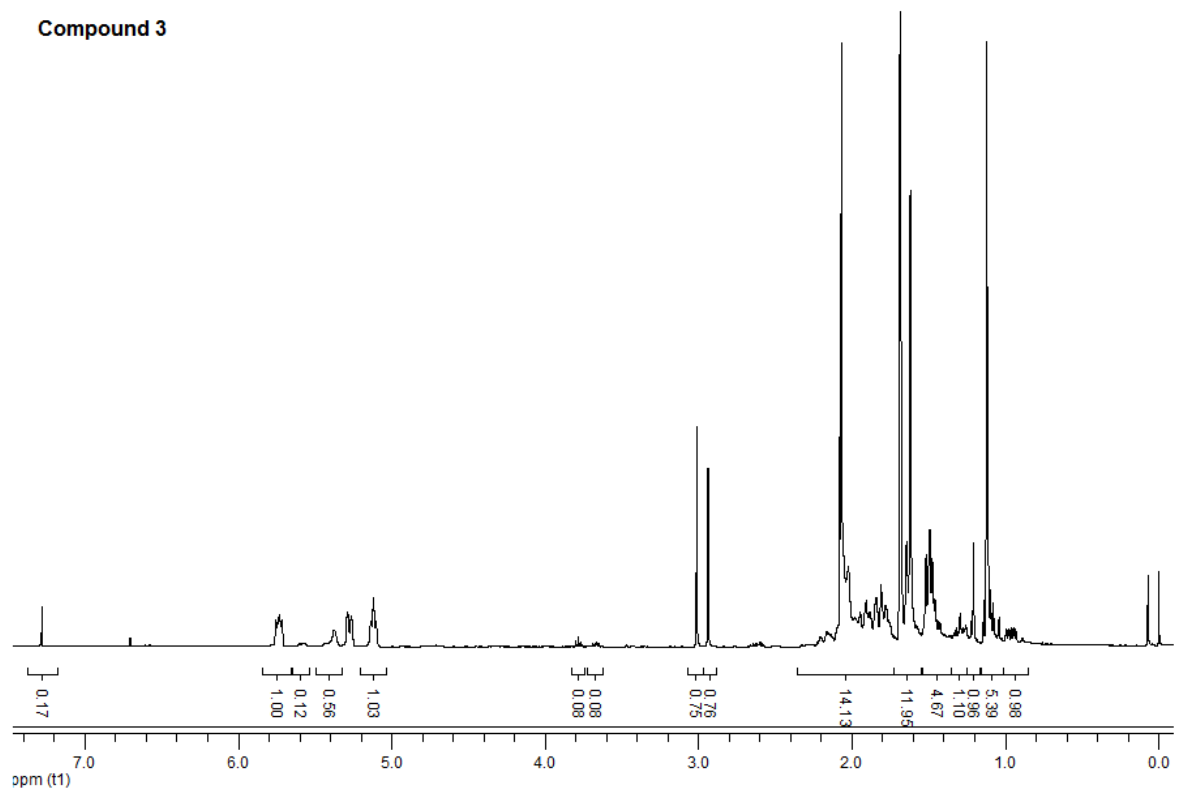

Compound 3

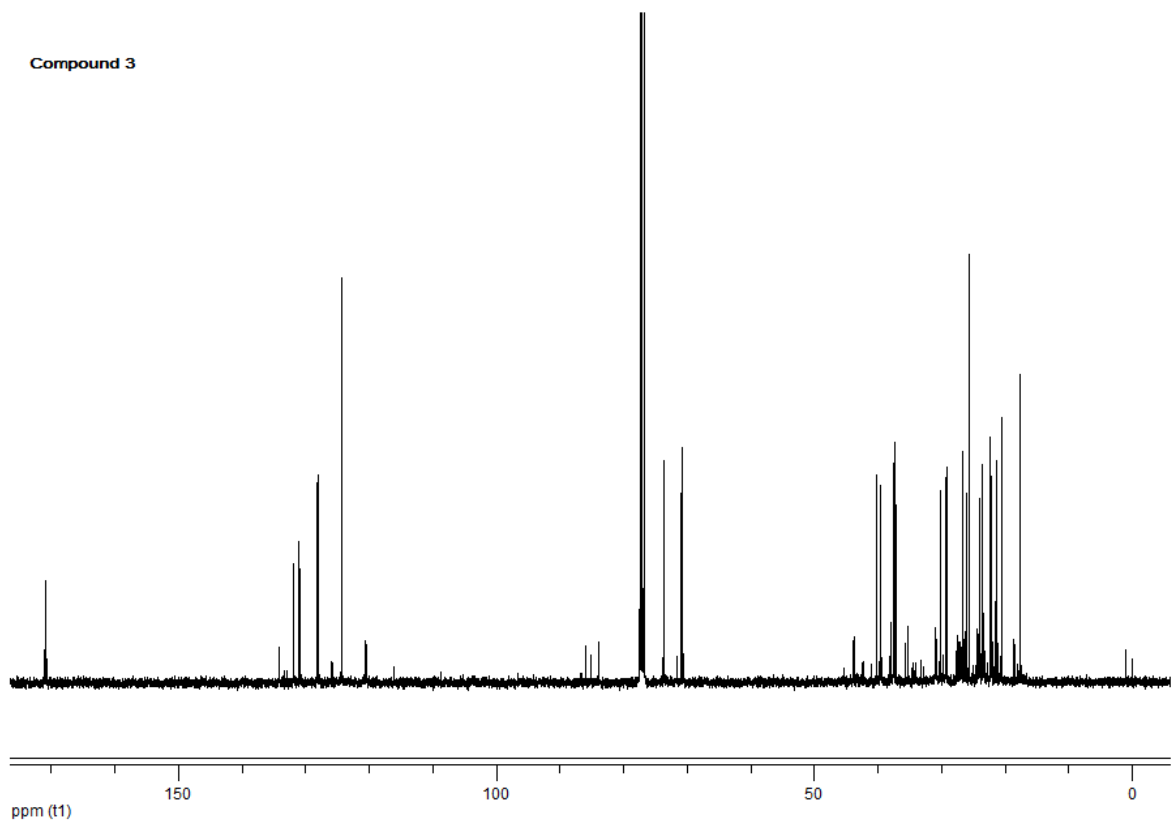

Fig. S3. <sup>1</sup>H and <sup>13</sup>C spectra of compound 3

Compound 4 (isomers 4a e 4b)

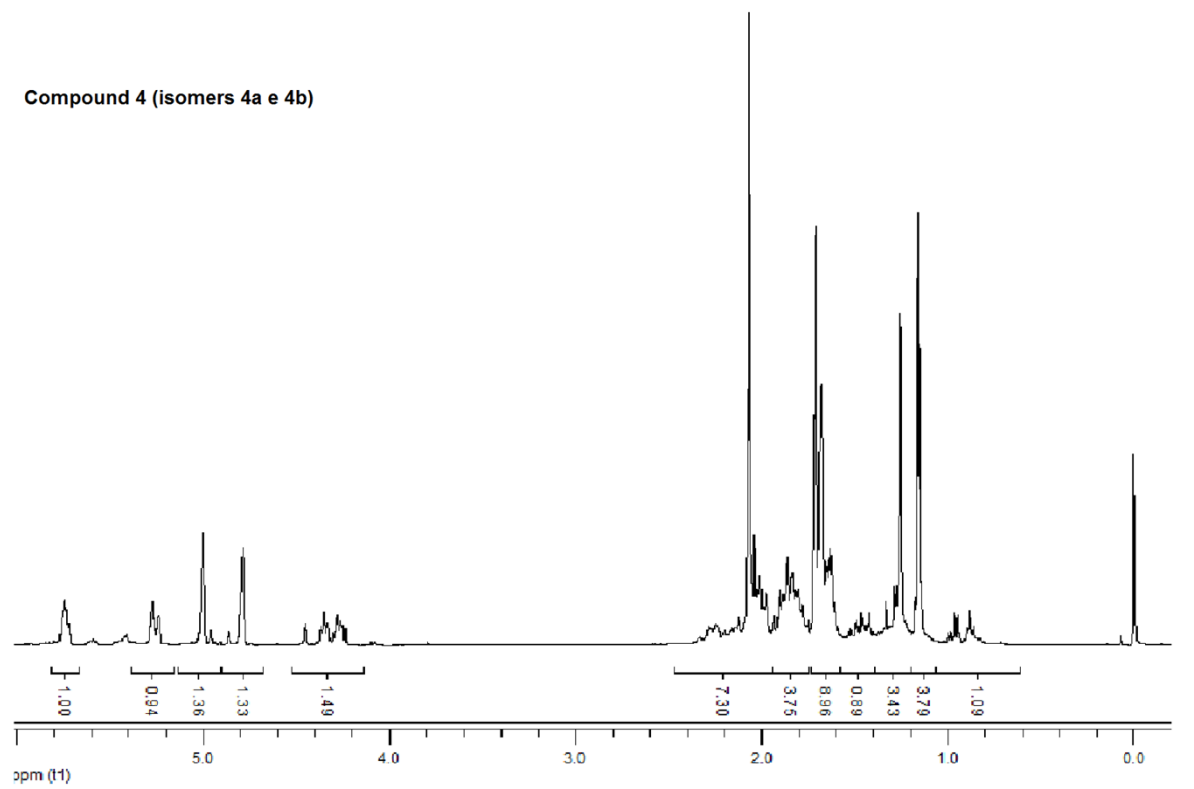

Compound 4 (isomers 4a e 4b)

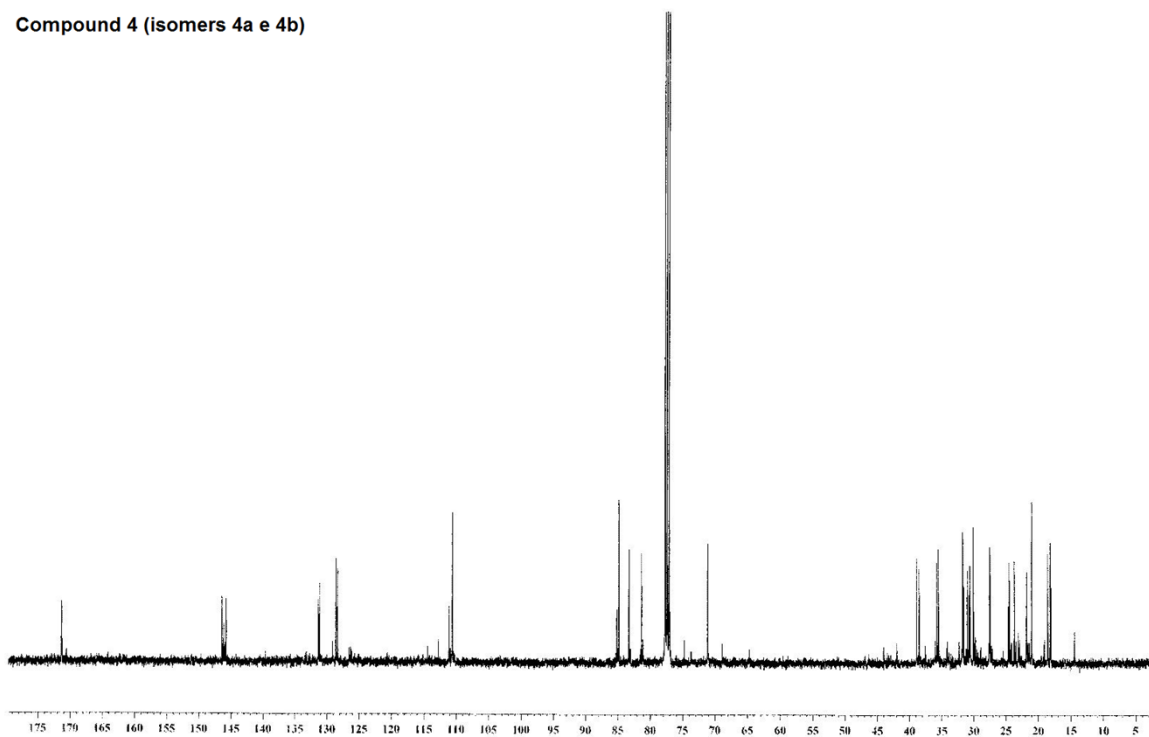

Fig. S4.  $^1\text{H}$  and  $^{13}\text{C}$  spectra of compound 4 (the solution contains isomers 4a and 4b).

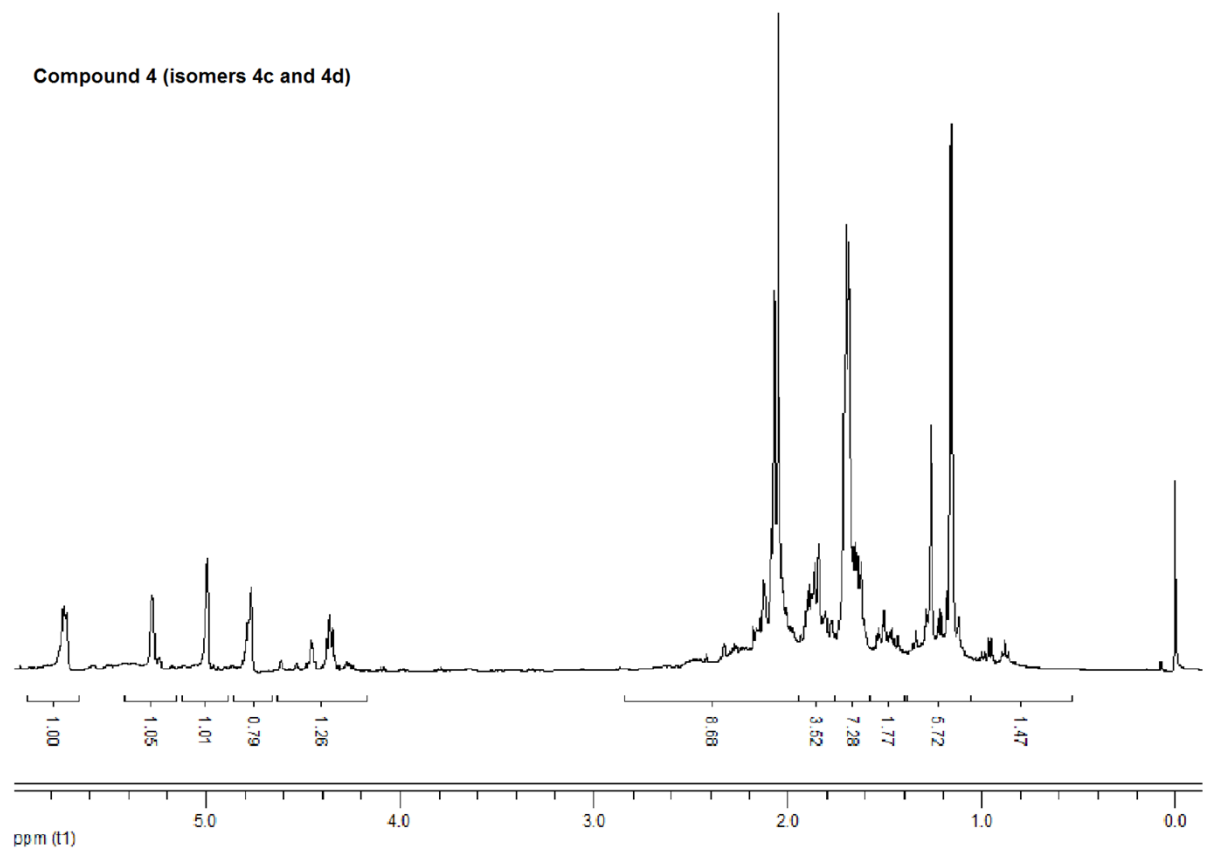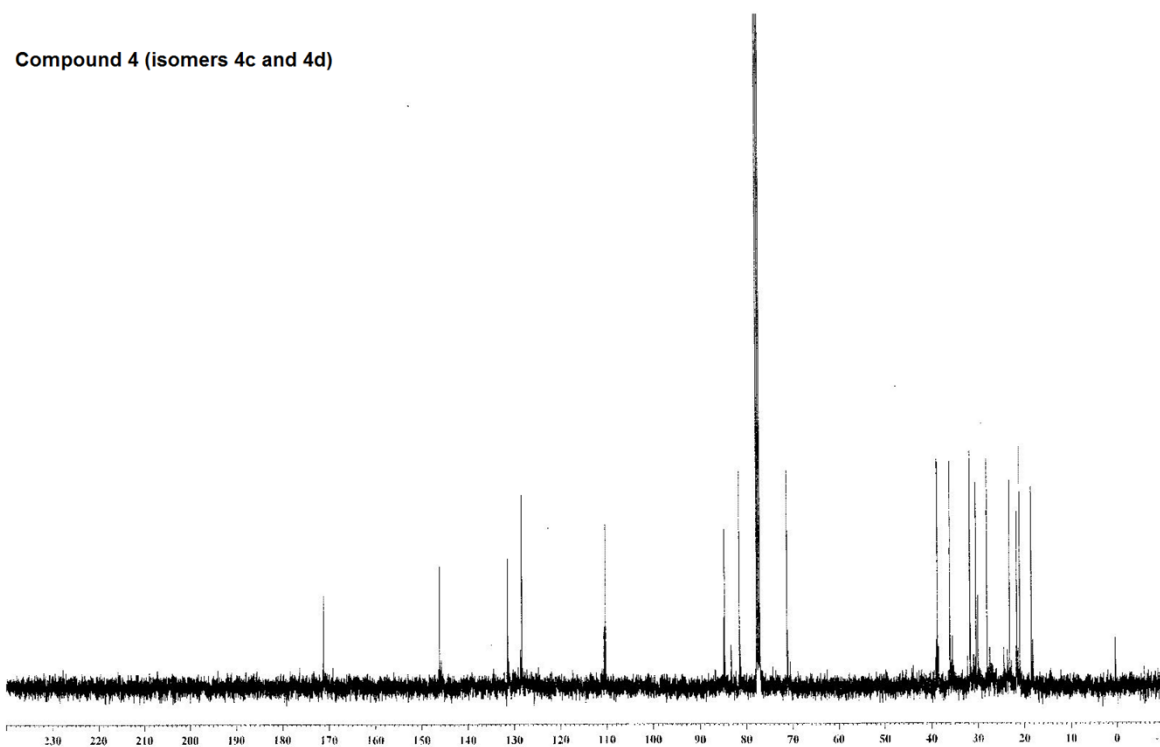

Fig. S5.  $^1\text{H}$  and  $^{13}\text{C}$  spectra of compound **4** (the solution contains isomers **4c** and **4d**).
